# Supplementary figures and images for: PPAR-α Agonist Fenofibrate Ameliorates Sjögren Syndrome–Like Dacryoadenitis by Modulating Th1/Th17 and Treg Cell Responses in NOD Mice
Source: PubMed Central journal article supplement — Invest Ophthalmol Vis Sci. 2022 Jun 10;63(6):12. doi: 10.1167/iovs.63.6.12 (PMC9202336; doi:10.1167/iovs.63.6.12), 2022-06-10

Supplementary Figure  
Figure 1

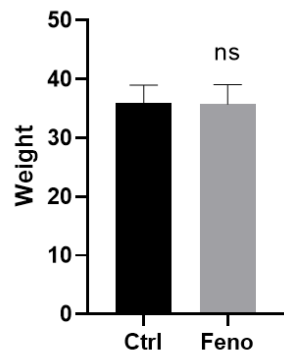

Supplemental Figure 1. Effect of fenofibrate on body weight.

Supplement: iovs-63-6-12_s001.pdf [file iovs-63-6-12_s001.pdf]
